# Supplementary material
Source: PubMed Central journal article supplement (PMC3689248)
Supplement: supp_blood-2013-02-486142_blood-2013-02-486142-1.pdf [file supp_blood-2013-02-486142_blood-2013-02-486142-1.pdf]

**Supplementary Table 1. Flow cytometry antibodies.**

| <b>Antibody</b>  | <b>Clone</b>                                       | <b>Company</b> |
|------------------|----------------------------------------------------|----------------|
| CD34             | RAM34                                              | eBiosciences   |
| Flk2             | A2F10                                              | eBiosciences   |
| Sca-1            | D7                                                 | eBiosciences   |
| FcgRII/III       | 93                                                 | eBiosciences   |
| c-kit            | 2B8                                                | eBiosciences   |
| CD48             | HM48-1                                             | eBiosciences   |
| CD150            | mShad150                                           | eBiosciences   |
| Lineage cocktail | 145-2C11<br>RA3-6B2<br>M1/70<br>RB6-8C5<br>TER-119 | eBiosciences   |
| CD3              | 145-2C11                                           | eBiosciences   |
| B220             | RA3-6B2                                            | eBiosciences   |
| CD11b            | M1/70                                              | eBiosciences   |
| Gr-1             | RB6-8C5                                            | eBiosciences   |
| CD45.1           | A20                                                | Biolegend      |
| CD45.2           | 104                                                | Biolegend      |
| Annexin V        |                                                    | eBiosciences   |

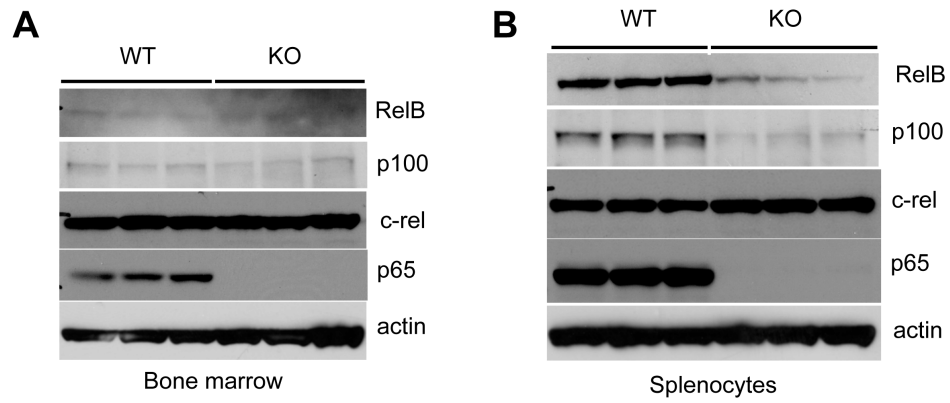

**Figure S1, related to Figure 1. Expression of NF-κB subunits in hematopoietic cells.**

**A.** Whole bone marrow or **B.** whole splenocytes from  $p65^{\text{hem-/-}}$  or wild-type mice were analyzed for protein expression of NF-κB subunits.

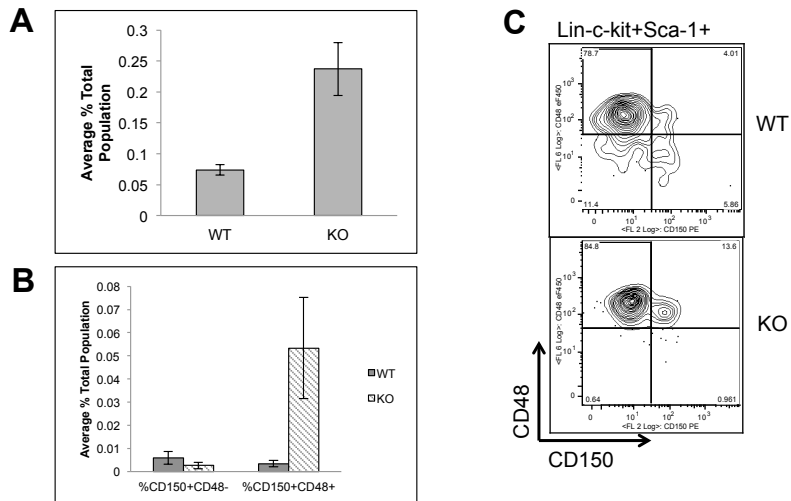

**Figure S2, related to Figure 2. Deletion of p65 results in the accumulation of LSKCD48+CD150+ bone marrow cells.** Bone marrow cells from VCre+ (WT) or p65<sup>hem-/-</sup> mice were analyzed for the frequency of **A.** LSK cells, and **B.** CD150+CD48+ or CD48- cell by flow cytometry (n=6). **C.** The average percentage of cells is displayed.
